# Supplementary material for: Social determinants of syphilis in South China: the effect of sibling position on syphilis and sexual risk behaviours
Source: PubMed Central journal article supplement — BMJ Open. 2013 May 17;3(5):e002834. doi: 10.1136/bmjopen-2013-002834 (PMC3657676; doi:10.1136/bmjopen-2013-002834), 2013-05-17
Supplement: bmjopen-2013-002834.draft_revisions.pdf [file bmjopen-2013-002834.draft_revisions.pdf]

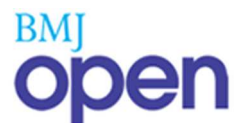

**Social Determinants of Syphilis in South China: The Effect of Sibling Position on Syphilis and Sexual Risk Behaviors**

|                                 |                                                                                      |
|---------------------------------|--------------------------------------------------------------------------------------|
| Journal:                        | <i>BMJ Open</i>                                                                      |
| Manuscript ID:                  | bmjopen-2013-002834                                                                  |
| Article Type:                   | Research                                                                             |
| Date Submitted by the Author:   | 05-Mar-2013                                                                          |
| Complete List of Authors:       | Tucker, Joseph<br>Young, Darwin<br>Yang, Ligang<br>Yang, Bin<br>Adimora, Adaora      |
| <b>Primary Subject Heading</b>: | Sexual health                                                                        |
| Secondary Subject Heading:      | Infectious diseases, Public health, Sociology                                        |
| Keywords:                       | Public health < INFECTIOUS DISEASES, HIV & AIDS < INFECTIOUS DISEASES, PUBLIC HEALTH |
|                                 |                                                                                      |

SCHOLARONE™  
Manuscripts

1  
2  
3  
4  
5  
6  
7  
8  
9  
10 Social Determinants of Syphilis in South China: The Effect of Sibling Position on Syphilis and  
11 Sexual Risk Behaviors

12  
13  
14  
15 Research Article  
16  
17  
18  
19  
20

21 Joseph D Tucker<sup>1,2,3</sup>, Darwin Young<sup>2</sup>, Ligang Yang<sup>3</sup>, Bin Yang<sup>3</sup>, Adaora A Adimora<sup>2</sup>

22  
23  
24 <sup>1</sup>University of North Carolina Project-China, Number 2 Lujing Road, Guangzhou, China

25  
26 <sup>2</sup>Division of Infectious Diseases, School of Medicine, UNC Chapel Hill, Chapel Hill, USA

27  
28 <sup>3</sup>Guangdong Provincial STD Control Center, Number 2 Lujing Road, Guangzhou, China  
29  
30  
31

32 Corresponding author:

33  
34 Joseph D. Tucker, MD, MA

35  
36 Director, UNC Project – China

37  
38 Number 2 Lujing Road, Guangzhou, China, Tel: (86) 13560294997, Email:  
39 jdtucker@med.unc.edu  
40  
41  
42  
43  
44  
45  
46  
47  
48  
49  
50  
51  
52  
53  
54  
55  
56  
57  
58  
59  
60

1  
2  
3 Objective: This study evaluated the relationship between sibling position and sexual risk based  
4 on behavioral and syphilis infection data from sexually transmitted infection (STI) patients in  
5 South China.  
6  
7  
8  
9

10  
11 Design: Cross-sectional study examining sexual behaviors and syphilis infection.  
12

13  
14 Setting: Four STI clinics in the Pearl River Delta of South China.  
15

16  
17 Participants: 1792 Chinese men and women attending STI clinics.  
18  
19

20  
21 Primary Outcome Measures: STI history, syphilis infection defined as positive nontreponemal  
22 and treponemal tests.  
23  
24

25  
26 Results: Among all STI patients, 824 (46.3%) were first-born, 354 (19.9%) were middle-born,  
27 and 602 (33.8%) were final-born. Middle-born individuals had a higher percentage of reported  
28 STI history (44.7% compared to 34.7%,  $p < 0.001$ ) and syphilis infection (9.7% compared to  
29 4.9%,  $p = 0.01$ ) among men compared to other sibling positions in bivariate analyses. The  
30 relationship between sibling position and syphilis was independent of income and education  
31 level. There was no trend observed between middle-born position and female sexual risk  
32 behaviors. Higher education was significantly associated with syphilis among women and men  
33 in respective multivariate models.  
34  
35  
36  
37  
38  
39  
40  
41  
42  
43  
44  
45

46 Conclusion: This study suggests that middle-born men in China have an increased sexual risk  
47 compared to other sibling positions. As Chinese family and social structures change, a more  
48 thorough understanding of how demographic factors influence sexual risk behaviors is needed.  
49  
50  
51  
52  
53  
54  
55  
56  
57  
58  
59  
60

## Article Summary

### Article Focus:

- Understanding the social and family changes that influence sexual risk behaviors are critical for designing effective STD control responses.
- Few studies have examined the influence of sibling position on sexual risk behaviors.

### Key Messages:

- Middle-born South Chinese men have an increased sexual risk compared to other sibship positions and this trend is not observed in women.
- The relationship between sibling position and sexual risk was not related to homosexual behavior, income, or education.
- Demographic changes in China related to family norms may have important implications for persistent syphilis transmission.

### Strengths and Limitations:

- This was a relatively large study in a region with an expanding syphilis epidemic, using biomarker and behavioral endpoints.
- More detailed information about sibling relationships was not collected as part of this research.

## Introduction

1  
2  
3 Syphilis has made a marked resurgence across China [1 2], raising questions about social,  
4 economic, and other contextual factors that may contribute to transmission. Social determinants  
5 that likely drive onward syphilis transmission [3] include gender inequality [4], poverty [5], sex  
6 ratios [6], and changing family structure [7]. Dynamic family structures in China could  
7 influence syphilis transmission through a number of distinct mechanisms. Increases in the  
8 number of poor, uneducated men who are unable to find brides (“surplus men”) could lead to an  
9 increased demand for unsafe sex [8]. Rises in divorce could also contribute to the expansion of  
10 syphilis [7]. In recent years the easing of China’s One-Child Policy has created more families  
11 with multi-sibling families [9].

12  
13  
14  
15  
16  
17  
18  
19  
20  
21  
22  
23  
24  
25  
26  
27  
28  
29  
30  
31  
32  
33  
34  
35  
36  
37  
38  
39  
40  
41  
42  
43  
44  
45  
46  
47  
48  
49  
50  
51  
52  
53  
54  
55  
56  
57  
58  
59  
60

There are several potential mechanisms whereby sibling position (or birth order) could directly or indirectly contribute to increased sexual risk behaviors. Later born siblings receive less parental investment and consequently have less education [10-12], less income [13 14], and worse health [15 16] compared to their earlier born counterparts. The trend towards lower socio-economic status could increase sexual risk behaviors among later born siblings. Studies among American adolescents have suggested that later born siblings have increased sexual risk behaviors [17-19], but there have not been similar research studies among adults. Men with older brothers have a substantially higher chance of being homosexual [20-22], another potential mechanism linking sibling position and sexual behaviors.

Given rapid changes in Chinese family structure and social dynamics, understanding the influence of demographic variables such as sibling position on sexual risk behaviors is important. The purpose of this study was to examine the effect of sibling position on history of STIs and syphilis among a sample of STI patients in South China.

## Methods

This study recruited STI outpatients in China as part of the larger Plum Blossom Study which has been previously described [23]. Briefly, public STI clinics in four sites of the Pearl River Delta region of Guangdong Province were selected using a probability proportional-to-size sampling method [23]. All STI patients were invited to participate and information about those who refused to participate was also collected.

A written survey for public STI outpatients was field tested among 12 patients in one of the cities. The survey had 58 items, with most items coming from the China Health and Family Life Survey, a population-representative study of sexual behaviors in China [24]. The survey included domains on sociodemographic information, sexual behaviors, and sibling position. The sibling position question asked about the total number of younger brothers, younger sisters, older brothers, and older sisters in their family. An only child would be coded “0-0-0-0” since they have zero of each of these types of siblings.

From September 2009 until January 2010, potential study subjects were recruited by physicians and nurses at selected STI clinics. All STI patients older than 17 years old were eligible for participation, regardless of their interest in receiving syphilis testing. Potential participants were referred to a separate, quiet room to speak with a research assistant about joining the study. Participation in the survey was voluntary and no incentives were given to patients to participate in the study. Those who agreed to participate in the study were given STI counseling after providing verbal informed consent to a trained research assistant. STI patients were offered testing and then entered the study.

1  
2  
3 All participants had approximately five mL of venous blood taken for treponemal syphilis  
4 testing. All samples had subsequent nontreponemal confirmation and those with syphilis  
5 infection received treatment according to standard guidelines.  
6  
7  
8  
9

10 The primary outcome of the study was having a positive treponemal syphilis serology.  
11 Missing values accounted for less than 10% of all the respective independent variables.  
12 Occupation was dichotomized into entertainment and non-entertainment based on earlier work  
13 supporting higher sexual risk behaviors at entertainment establishments [25]. First-borns were  
14 categorized as being either the eldest or only children. Middle-borns had at least one elder sibling  
15 and one younger sibling. Final-borns included those with at least one older sibling and no  
16 younger siblings. Multicollinearity was assessed by calculating the variance inflation factor  
17 (VIF) and excluding factors with a VIF over 5. Bivariate relationships were analyzed and  
18 unadjusted odds ratios with 95% confidence intervals were reported. Bivariate relationships  
19 were calculated for all participants, only men, and only women. Multivariate logistic regression  
20 models for men and women respectively were developed by taking all bivariate relationships  
21 found to be associated with syphilis infection with  $p < 0.10$ .  
22  
23  
24  
25  
26  
27  
28  
29  
30  
31  
32  
33  
34  
35  
36  
37  
38

39 This research protocol and consent procedure was approved by the Medical Ethics  
40 Committee of Chinese Academy of Medical Sciences Institute of Dermatology (Nanjing, China),  
41 the University of North Carolina Institutional Review Board (Chapel Hill, USA), and the  
42 Partners Committee on Human Subjects Research (Boston, USA).  
43  
44  
45  
46  
47  
48  
49

## 50 **Results**

51  
52  
53 A total of 1792 eligible individuals (consenting STI patients older than 17 years old)  
54 participated in this study. Details of the 271 (13.1%) who refused to participate have been  
55  
56  
57  
58  
59  
60

1  
2  
3 described elsewhere [23]. Most STI patients were 40 years old or younger, men, unmarried, had  
4 an annual income of equal to or less than 3700 USD, had education less than or equal to high  
5 school, and were not working in the entertainment industry (Table 1). Among all STI patients,  
6 824 (46.3%) were first-born, 354 (19.9%) were middle-born, and 602 (33.8%) were final-born.  
7  
8 HIV risk behaviors are reported in Table 2. 721 (40.3%) of individuals reported having a history  
9 of a sexually transmitted infection.  
10  
11

12  
13  
14  
15  
16  
17  
18  
19 Among the 1792 participants, 1280 (71.4%) had never been tested for syphilis infection  
20 in the past. A total of 1705 (95.1%) of patients were willing to be tested for syphilis infection  
21 and 1702 (95.0%) accepted testing. A total of 139 (7.8%) of individuals had a positive syphilis  
22 test. Most STI patients (1037, 63.6%) reported not using a condom during the last episode of sex  
23 with their non-primary sex partner. Relatively few STI patients reported a history of injecting  
24 drug use or same-sex behavior (Table 2).  
25  
26  
27  
28  
29  
30  
31  
32

33  
34 Among all STI patients (N = 1792), the following factors were significantly associated  
35 with syphilis in univariate analyses: middle-born (OR 1.72, 95% CI 1.24-2.63) compared to  
36 being first-born or final-born; women (OR 2.36, 95% 1.67-3.35) compared to men; unmarried  
37 (OR 2.35, 95% CI 1.54-3.60) compared to married; education greater than high school (OR 1.66,  
38 95% CI 1.17-2.36) compared to high school or less education; not living in Site D (OR 0.36,  
39 95% CI 0.18-0.72) compared to living in the other cities; ever engaged in commercial sex (OR  
40 1.81, -1.16-2.94) compared to never having engaged in commercial sex; and history of  
41 intravenous drug use (OR 5.86, 95% CI 1.74-19.73). Middle-born sibling position was also  
42 associated with a higher percentage of reported STI history (44.7% compared to 34.7%,  $p <$   
43 0.001). Being middle-born was not associated with reporting homosexual behaviors ( $p = 0.4$ ).  
44  
45  
46  
47  
48  
49  
50  
51  
52  
53  
54  
55  
56  
57  
58  
59  
60



1  
2  
3 The multivariate model predicting syphilis among male STI patients (N = 1163) included  
4 higher education, not living in Site D, and ever engaging in commercial sex (Table 3). Sibling  
5 position, age, marital status, and IDU history were not in the final model. Middle-born sibling  
6 position was significantly related to ever engaging in commercial sex. The multivariate model  
7 predicting syphilis among female STI patients (N = 626) included unmarried, higher education,  
8 and not living in Site D (Table 4).  
9  
10  
11  
12  
13  
14  
15  
16  
17  
18  
19  
20

## 21 Discussion

22  
23  
24 The resurgent syphilis epidemic in China forces broader thinking and action about this  
25 ancient pathogen. Changing family structure, perhaps through its social and economic effects on  
26 individuals, may have important implications for the expansion of syphilis [6]. To our  
27 knowledge, this is the first study to examine the sexual risk behaviors of adults according to  
28 sibling position. Easing of China's One Child Policy has already resulted in greater multi-sibling  
29 families and this trend is likely to increase over time [9]. Both sexual preference and socio-  
30 economic status are known to vary according to sibling position and may contribute to  
31 differential sexual risk behaviors.  
32  
33  
34  
35  
36  
37  
38  
39  
40  
41  
42  
43

44 Our results suggest that middle-born men have a higher risk of STI history and a greater  
45 risk of purchasing sex. The relationship between middle-born and history of syphilis was  
46 independent of self-reported homosexuality, income, and education levels. Adolescent research  
47 from the United States has suggested that later sibling positions have an increased sexual risk  
48 behaviors [17-19]. This effect in adolescents is thought to be related to the influence of having  
49 sexually active older siblings who influence their younger brothers and sisters [26 27] or  
50  
51  
52  
53  
54  
55  
56  
57  
58  
59  
60

1  
2  
3 relatively less psychological support from parents [28]. The trend of middle-born individuals  
4 having a higher risk of STIs and purchasing sex could be related to persistence of the effect  
5 found in adolescence. Psychological attributes associated with individuals who are middle  
6 siblings (e.g., more relaxed attitude [29]) may also establish a context for increased sexual risk  
7 taking.  
8  
9

10  
11  
12  
13  
14  
15  
16 Our finding that more highly educated women are more likely to have syphilis infection  
17 contrasts with studies of other STIs among Chinese women. For example, a population-  
18 representative study of chlamydia in China found that women who had less education were more  
19 likely to have chlamydia [24] and this trend has been found in a number of other studies [30-32].  
20  
21 The observed association between higher education and syphilis among women in our study,  
22 however, is consistent with previous research that demonstrated greater syphilis risk among  
23 Chinese men with more education [7 24]. Groups of high-income men in China often  
24 incorporate visits to sex venues as part of business banquets, using such opportunities to  
25 establish, maintain, and extend social relationships critical for work – and potentially increasing  
26 risk of STI transmission to their wives [33].  
27  
28  
29  
30  
31  
32  
33  
34  
35  
36  
37  
38  
39

40 There are several important limitations in this study. First, our study was not a  
41 population-based sample and so generalizations should be made with caution. Second, our study  
42 was only cross-sectional and so the cumulative sexual risk could not be captured within a single  
43 syphilis measurement. Third, this study only examined public STI clinics but did not explore  
44 private clinics where a subset of high-risk men probably seek sexual health services. However,  
45 public clinics are the most common source of clinical STI service [24] and the only sector with  
46 the physician, laboratory, and nurse capacity to undertake research.  
47  
48  
49  
50  
51  
52  
53  
54  
55  
56  
57  
58  
59  
60

1  
2  
3 Major family and social changes underway in China are likely to influence sexual risk  
4 behaviors and the extent to which unsafe commercial sex becomes normalized. Social  
5  
6 determinants may have an impact at multiple levels – family, neighborhood, city, and higher  
7  
8 levels of organization. A better understanding of how family structure influences sexual risk  
9  
10 behavior is important for designing effective interventions.  
11  
12  
13  
14  
15  
16  
17  
18  
19  
20  
21  
22  
23  
24  
25  
26  
27  
28  
29  
30  
31  
32  
33  
34  
35  
36  
37  
38  
39  
40  
41  
42  
43  
44  
45  
46  
47  
48  
49  
50  
51  
52  
53  
54

## 55 **References**

56  
57  
58  
59  
60

1. Chen ZQ, Zhang GC, Gong XD, et al. Syphilis in China: results of a national surveillance programme. *Lancet* 2007;**369**(9556):132-8.
2. Tucker JD, Chen XS, Peeling RW. Syphilis and social upheaval in China. *N Engl J Med* 2010;**362**(18):1658-61.
3. Tucker JD, Cohen MS. China's syphilis epidemic: epidemiology, proximate determinants of spread, and control responses. *Curr Opin Infect Dis* 2011;**24**(1):50-5 doi: 10.1097/QCO.0b013e32834204bf[published Online First: Epub Date]].
4. Shahmanesh M, Cowan F, Wayal S, Copas A, Patel V, Mabey D. The burden and determinants of HIV and sexually transmitted infections in a population-based sample of female sex workers in Goa, India. *Sex Transm Infect* 2009;**85**(1):50-9 doi: 10.1136/sti.2008.030767[published Online First: Epub Date]].
5. Lopez-De Fede A, Stewart JE, Hardin JW, Mayfield-Smith K, Sudduth D. Spatial visualization of multivariate datasets: an analysis of STD and HIV/AIDS diagnosis rates and socioeconomic context using ring maps. *Public Health Rep* 2011;**126 Suppl 3**:115-26
6. Tucker JD, Henderson GE, Wang TF, et al. Surplus men, sex work, and the spread of HIV in China. *AIDS* 2005;**19**(6):539-47
7. Tan NX, Messina JP, Yang LG, et al. A Spatial Analysis of County-level Variation in Syphilis and Gonorrhoea in Guangdong Province, China. *PloS one* 2011;**6**(5):e19648 doi: 10.1371/journal.pone.0019648[published Online First: Epub Date]].
8. Tucker JD, Poston D, Qiang R. *Gender policy and HIV in China : catalyzing policy change*. 1st ed. New York: Springer, 2009.
9. Wang C. History of the Chinese Family Planning program: 1970-2010. *Contraception* 2011 doi: 10.1016/j.contraception.2011.10.013[published Online First: Epub Date]].
10. Downey DB. Number of siblings and intellectual development. The resource dilution explanation. *The American psychologist* 2001;**56**(6-7):497-504
11. Zajonc RB. Family configuration and intelligence. *Science* 1976;**192**(4236):227-36 doi: 10.1126/science.192.4236.227[published Online First: Epub Date]].
12. Steelman LC, Powell B, Werum R, Carter S. Reconsidering the Effects of Sibling Configuration: Recent Advances and Challenges. *Annual Review of Sociology* 2002;**28**:243-69
13. Keister LA. Sharing the wealth: the effect of siblings on adults' wealth ownership. *Demography* 2003;**40**(3):521-42
14. Keister LA, Keister LA. Race, family structure, and wealth: the effect of childhood family on adult asset ownership. *Sociological Perspectives* 2004;**47**:161-87
15. Nicolaou NC, Simpson A, Lowe LA, Murray CS, Woodcock A, Custovic A. Day-care attendance, position in sibship, and early childhood wheezing: a population-based birth cohort study. *The Journal of allergy and clinical immunology* 2008;**122**(3):500-6 e5 doi: 10.1016/j.jaci.2008.06.033[published Online First: Epub Date]].
16. Lawson DW, Mace R. Sibling configuration and childhood growth in contemporary British families. *International journal of epidemiology* 2008;**37**(6):1408-21 doi: 10.1093/ije/dyn116[published Online First: Epub Date]].
17. Rodgers JL, Rowe DC. Influence of siblings on adolescent sexual behavior. *Developmental Psychology* 1988;**24**:722-28
18. Reiss IL. *The social context of premarital sexual permissiveness*. New York: Holt, Rinehart & Winston, 1967
19. Rodgers JL. Family configuration and adolescent sexual behavior. *Population and Environment* 1983;**6**:73-83

- 1  
2  
3  
4  
5  
6  
7  
8  
9  
10  
11  
12  
13  
14  
15  
16  
17  
18  
19  
20  
21  
22  
23  
24  
25  
26  
27  
28  
29  
30  
31  
32  
33  
34  
35  
36  
37  
38  
39  
40  
41  
42  
43  
44  
45  
46  
47  
48  
49  
50  
51  
52  
53  
54  
55  
56  
57  
58  
59  
60
20. Bogaert AF. Biological versus nonbiological older brothers and men's sexual orientation. *Proc Natl Acad Sci U S A* 2006;**103**(28):10771-4 doi: 10.1073/pnas.0511152103[published Online First: Epub Date]].
  21. Schwartz G, Kim RM, Kolundzija AB, Rieger G, Sanders AR. Biodemographic and physical correlates of sexual orientation in men. *Arch Sex Behav* 2010;**39**(1):93-109 doi: 10.1007/s10508-009-9499-1[published Online First: Epub Date]].
  22. Puts DA, Jordan CL, Breedlove SM. O brother, where art thou? The fraternal birth-order effect on male sexual orientation. *Proc Natl Acad Sci U S A* 2006;**103**(28):10531-2 doi: 10.1073/pnas.0604102103[published Online First: Epub Date]].
  23. Tucker JD, Yang LG, Yang B, et al. A Twin Response to Twin Epidemics: Integrated HIV/Syphilis Testing at STI clinics in South China. *J Acquir Immune Defic Syndr* 2011 doi: 10.1097/QAI.0b013e31821d3694[published Online First: Epub Date]].
  24. Parish WL, Laumann EO, Cohen MS, et al. Population-based study of chlamydial infection in China: a hidden epidemic. *JAMA* 2003;**289**(10):1265-73 doi: 10.1001/jama.289.10.1265 [pii][published Online First: Epub Date]].
  25. Li L, Wu Z, Rotheram-Borus MJ, et al. Visiting entertainment venues and sexual health in China. *Arch Sex Behav* 2009;**38**(5):814-20 doi: 10.1007/s10508-008-9311-7[published Online First: Epub Date]].
  26. Miller BC, Benson B, Galbraith KA. Family Relationships and Adolescent Pregnancy Risk: A Research Synthesis. *Developmental Review* 2001;**21**:1-38
  27. Rwenge M. Sexual Risk Behaviors Among Young People In Bamenda, Cameroon. *International Family Planning Perspectives* 2000;**26**:118-23
  28. Terada T, Kasai M, Asano K. Psychological support for junior high school students: sibling order and sex. *Psychol Rep* 2006;**99**(1):179-90
  29. Sulloway FJ. *Born to rebel : birth order, family dynamics, and creative lives*. 1st Vintage Books ed. New York: Vintage Books, 1997.
  30. Li Y, Detels R, Lin P, et al. Difference in Risk Behaviors and STD Prevalence Between Street-Based and Establishment-Based FSWs in Guangdong Province, China. *AIDS and behavior* 2012 doi: 10.1007/s10461-011-0102-0[published Online First: Epub Date]].
  31. Lu F, Jia Y, Sun X, et al. Prevalence of HIV infection and predictors for syphilis infection among female sex workers in southern China. *The Southeast Asian journal of tropical medicine and public health* 2009;**40**(2):263-72
  32. Lu F, Jia Y, Bin S, et al. Predictors for casual sex and/or infection among sexually transmitted disease clinic attendees in China. *International journal of STD & AIDS* 2009;**20**(4):241-8 doi: 10.1258/ijisa.2008.008290[published Online First: Epub Date]].
  33. Uretsky E. 'Mobile men with money': the socio-cultural and politico-economic context of 'high-risk' behaviour among wealthy businessmen and government officials in urban China. *Cult Health Sex* 2008;**10**(8):801-14

### Financial Disclosure

This work was supported by an NIH Fogarty K01 Award (US NIH 1K01TW008200-01A1), the UNC Fogarty AIDS International Research and Training Program (NIH FIC D43 TW01039), the WHO Rapid Syphilis Test Project (UNICEF/UNDP/World Bank/WHO A70577), the Harvard Institute for Global Health, and a Burroughs Wellcome Fund/American Society of Tropical Medicine and Hygiene Wellcome Postdoctoral Fellowship in Tropical Infectious Diseases. The funders had no role in the study design, data collection and analysis, decision to publish, or preparation of the manuscript.

### Author Contributions

Conceived and designed the study: JDT, LY, BY. Performed the analysis: JDT, DY. Analyzed the data: LY, BY, JDT, AA. Contributed analysis tools: AA, BY. Wrote the paper: JDT, DY, LY, BY, AA.

### Competing interest

We declare that we have no conflicts of interest.

### Ethics Statement

All participants received verbal informed consent prior to participation. Verbal consent was used because of the minimal risk associated with participating in this study and documented by the research assistant who enrolled the patient in the study. This research protocol and consent procedure was approved by the Medical Ethics Committee of Chinese Academy of Medical

1  
2  
3 Sciences Institute of Dermatology (Nanjing, China), the University of North Carolina  
4  
5 Institutional Review Board (Chapel Hill, USA), and the Partners Committee on Human Subjects  
6  
7  
8 Research (Boston, USA).  
9  
10  
11  
12  
13  
14  
15  
16  
17  
18  
19  
20  
21  
22  
23  
24  
25  
26  
27  
28  
29  
30  
31  
32  
33  
34  
35  
36  
37  
38  
39  
40  
41  
42  
43  
44  
45  
46  
47

For peer review only

48 **Table 1. Socio-demographic correlates and bivariate relationships with syphilis among all**  
49 **STI patients (N = 1792).**  
50

| Socio-demographic Variables | No. (%) | No. Positive<br>for Syphilis,<br>(%) | Unadjusted OR (95%<br>CI) |
|-----------------------------|---------|--------------------------------------|---------------------------|
|                             |         |                                      |                           |

|                            |                   |              |            |                    |
|----------------------------|-------------------|--------------|------------|--------------------|
| <b>Sibling Position</b>    | First-born        | 824 (46.3)   | 57 (3.4)   | 1                  |
|                            | Middle-born       | 354 (19.9)   | 40 (12.0)  | 1.72 (1.24-2.63)   |
|                            | Final-born        | 602 (33.8)   | 41 (7.1)   | 0.98 (0.64-1.47)   |
| <b>Age</b>                 | >40 years old     | 412 (23.0)   | 41(10.5)   | 1                  |
|                            | ≤40 years old     | 1380 (77.0)  | 98 (7.5)   | 0.69(.47-1.01)     |
| <b>Sex</b>                 | Male              | 1163 (65.0)  | 63 (5.8)   | 1                  |
|                            | Female            | 626 (35.0)   | 76 (12.6)  | 2.36 (1.67-3.35)   |
| <b>Marital Status</b>      | Married           | 624 (37.9)   | 29 (4.7)   | 1                  |
|                            | Unmarried         | 1021 (62.1)  | 105 (10.3) | 2.35 (1.54-3.60)   |
| <b>Annual Income</b>       | ≤ 3700 USD        | 882 (57.5)   | 79 (9.0)   | 1                  |
|                            | >3700 USD         | 651 (42.5)   | 42 (6.5)   | 0.70 (0.48-1.03)   |
| <b>Education Completed</b> | ≤ High school     | 1054 (62.8)  | 70 (6.6)   | 1                  |
|                            | > High school     | 625 (37.2)   | 66 (10.6)  | 1.66 (1.17 – 2.36) |
| <b>Site</b>                | Site A            | 355 (20.9)   | 36 (10.1)  | 1                  |
|                            | Site B            | 453 (26.7)   | 34 (7.5)   | 0.72 (0.44-1.18)   |
|                            | Site C            | 608 (35.8)   | 58 (9.5)   | 0.93 (0.60-1.45)   |
|                            | Site D            | 283 (16.7)   | 11 (3.9)   | 0.36 (0.18-0.72)   |
| <b>Occupation</b>          | Entertainment     | 69 (4.1)     | 7 (10.1)   | 1                  |
|                            | Non-entertainment | 1604 (95.88) | 129 (8.0)  | 0.78 (0.35 – 1.73) |

**Table 2. HIV risk behaviors among all STI patients (N = 1792).**

| <b>Risk Behaviors</b> | <b>No. (%)</b> | <b>No. Positive for Syphilis, (%)</b> | <b>Unadjusted OR (95% CI)</b> |
|-----------------------|----------------|---------------------------------------|-------------------------------|
|-----------------------|----------------|---------------------------------------|-------------------------------|



|                                                       |     |             |           |                   |
|-------------------------------------------------------|-----|-------------|-----------|-------------------|
| <b>Condom use for non-primary partner<sup>1</sup></b> | Yes | 593 (36.4)  | 43 (7.3)  | 1                 |
|                                                       | No  | 1037 (63.6) | 92 (8.8)  | 1.25 (0.85-1.82)  |
| <b>Ever engaged in commercial sex</b>                 | No  | 1137 (70.8) | 24 (5.1)  | 1                 |
|                                                       | Yes | 468 (29.2)  | 103 (9.1) | 1.81 (1.16-2.94)  |
| <b>IDU history</b>                                    | No  | 1667 (99.3) | 131 (7.9) | 1                 |
|                                                       | Yes | 12 (.7)     | 4 (33.3)  | 5.86 (1.74-19.73) |
| <b>Ever engaged in MSM activities<sup>2</sup></b>     | No  | 1057(98.5)  | 61 (5.8)  | 1                 |
|                                                       | Yes | 16 (1.5)    | 1 (6.3)   | 1.09 (0.14-8.38)  |

<sup>1</sup>During the last sex with non-primary partner, did you use a condom?

<sup>2</sup>Analysis restricted to men only.

**Table 3. Multivariate model predicting syphilis among all male STI patients (N =1163).**

| <b>Predictor</b>                      |               | <b>Adjusted OR<br/>(95% CI)</b> |
|---------------------------------------|---------------|---------------------------------|
| <b>Sibling position</b>               | First-born    | 1                               |
|                                       | Middle-born   | 1.58 (0.77-3.28)                |
|                                       | Final-born    | 0.99 (0.50-1.96)                |
| <b>Age</b>                            | >40 years old | 1                               |
|                                       | ≤40 years old | 0.59 (0.32-1.09)                |
| <b>Marital Status</b>                 | Married       | 1                               |
|                                       | Unmarried     | 2.13 (0.89-2.84)                |
| <b>Education</b>                      | ≤ High school | 1                               |
|                                       | > High school | 1.59 (1.20-3.47)                |
| <b>Site</b>                           | Site A        | 1                               |
|                                       | Site B        | 0.90 (0.43-1.88)                |
|                                       | Site C        | 0.69 (0.35-1.37)                |
|                                       | Site D        | 0.21 (.06-0.73)                 |
| <b>Ever engaged in commercial sex</b> | No            | 1                               |
|                                       | Yes           | 1.90 (1.04-3.50)                |
| <b>IDU history</b>                    | No            | 1                               |
|                                       | Yes           | 4.44 (0.05-39.98)               |

Table 4. Multivariate model predicting syphilis among all female STI patients (N = 626).

| Predictor                             |               | Adjusted OR<br>(95% CI) |
|---------------------------------------|---------------|-------------------------|
| <b>Sibling position</b>               | First-born    | 1                       |
|                                       | Middle-born   | 1.21 (0.63-2.32)        |
|                                       | Final-born    | 0.90 (0.47-1.73)        |
| <b>Age</b>                            | >40 years old | 1                       |
|                                       | ≤40 years old | 1.17 (0.57-2.43)        |
| <b>Marital Status</b>                 | Married       | 1                       |
|                                       | Unmarried     | 2.62 (1.38-4.96)        |
| <b>Education</b>                      | ≤ High school | 1                       |
|                                       | > High school | 1.77 (1.01-3.12)        |
| <b>Site</b>                           | Site A        | 1                       |
|                                       | Site B        | 0.46 (0.21-1.00)        |
|                                       | Site C        | 0.78 (0.38-1.61)        |
|                                       | Site D        | 0.22 (0.09-0.56)        |
| <b>Ever engaged in commercial sex</b> | No            | 1                       |
|                                       | Yes           | 0.97 (0.40-2.37)        |



**Social Determinants of Syphilis in South China: The Effect of Sibling Position on Syphilis and Sexual Risk Behaviors**

|                                 |                                                                                      |
|---------------------------------|--------------------------------------------------------------------------------------|
| Journal:                        | <i>BMJ Open</i>                                                                      |
| Manuscript ID:                  | bmjopen-2013-002834.R1                                                               |
| Article Type:                   | Research                                                                             |
| Date Submitted by the Author:   | 29-Apr-2013                                                                          |
| Complete List of Authors:       | Tucker, Joseph<br>Young, Darwin<br>Yang, Ligang<br>Yang, Bin<br>Adimora, Adaora      |
| <b>Primary Subject Heading</b>: | Sexual health                                                                        |
| Secondary Subject Heading:      | Infectious diseases, Public health, Sociology                                        |
| Keywords:                       | Public health < INFECTIOUS DISEASES, HIV & AIDS < INFECTIOUS DISEASES, PUBLIC HEALTH |
|                                 |                                                                                      |

SCHOLARONE™  
Manuscripts

1  
2  
3  
4  
5  
6  
7  
8  
9  
10 Social Determinants of Syphilis in South China: The Effect of Sibling Position on Syphilis and  
11 Sexual Risk Behaviors

12  
13  
14  
15 Research Article  
16  
17  
18  
19  
20

21 Joseph D Tucker<sup>1,2,3</sup>, Darwin Young<sup>2</sup>, Ligang Yang<sup>3</sup>, Bin Yang<sup>3</sup>, Adaora A Adimora<sup>2</sup>

22  
23  
24 <sup>1</sup>University of North Carolina Project-China, Number 2 Lujing Road, Guangzhou, China

25  
26 <sup>2</sup>Division of Infectious Diseases, School of Medicine, UNC Chapel Hill, Chapel Hill, USA

27  
28 <sup>3</sup>Guangdong Provincial STD Control Center, Number 2 Lujing Road, Guangzhou, China  
29  
30  
31

32 Corresponding author:

33  
34 Joseph D. Tucker, MD, MA

35  
36 Director, UNC Project – China

37  
38 Number 2 Lujing Road, Guangzhou, China, Tel: (86) 13560294997, Email:  
39 jdtucker@med.unc.edu  
40  
41  
42  
43  
44  
45  
46  
47  
48  
49  
50  
51  
52  
53  
54  
55  
56  
57  
58  
59  
60

**ABSTRACT**

Objective: This study evaluated the relationship between sibling position and sexual risk based on behavioral and syphilis infection data from sexually transmitted infection (STI) patients in South China.

Design: Cross-sectional study examining sexual behaviors and syphilis infection.

Setting: Four STI clinics in the Pearl River Delta of South China.

Participants: 1792 Chinese men and women attending STI clinics.

Primary Outcome Measures: STI history, syphilis infection defined as positive nontreponemal and treponemal tests.

Results: Among all clinic patients, 824 (46.3%) were first-born, 354 (19.9%) were middle-born, and 602 (33.8%) were final-born. Middle-born individuals had a higher percentage of reported STI history (44.7% compared to 34.7%,  $p < 0.001$ ) and syphilis infection (9.7% compared to 4.9%,  $p = 0.01$ ) among men ( $n=1163$ ) compared to other sibling positions in bivariate analyses, but not in the final multivariate model. The relationship between sibling position and syphilis was independent of income and education level. There was no trend observed between middle-born position and female sexual risk behaviors ( $n=626$ ). Higher education was significantly associated with syphilis among women and men in respective multivariate models.

Conclusion: This study suggests that middle-born men in China may have an increased sexual risk compared to other sibling positions. As Chinese family and social structures change, a more thorough understanding of how demographic factors influence sexual risk behaviors is needed.

1  
2  
3  
4  
5  
6  
7 Article Summary  
8  
9

10 Article Focus:  
11

- 12 • Understanding the social and family changes that influence sexual risk behaviors are  
13 critical for designing effective STD control responses.  
14  
15
- 16 • Few studies have examined the influence of sibling position on sexual risk behaviors.  
17  
18  
19

20  
21  
22  
23  
24  
25 Key Messages:  
26

- 27 • Middle-born South Chinese men have an increased sexual risk compared to other sibship  
28 positions and this trend is not observed in women.  
29  
30
- 31 • The relationship between sibling position and sexual risk was not related to homosexual  
32 behavior, income, or education.  
33  
34
- 35 • Demographic changes in China related to family norms may have important implications  
36 for persistent syphilis transmission.  
37  
38  
39  
40  
41  
42  
43  
44

45 Strengths and Limitations:  
46

- 47 • This was a relatively large study in a region with an expanding syphilis epidemic, using  
48 biomarker and behavioral endpoints.  
49  
50
- 51 • More detailed information about sibling relationships was not collected as part of this  
52 research.  
53  
54  
55  
56  
57  
58  
59  
60

## Introduction

Syphilis has made a marked resurgence across China [1 2], raising questions about social, economic, and other contextual factors that may contribute to transmission. Social determinants that likely drive onward syphilis transmission [3] include gender inequality [4], poverty [5], sex ratios [6], and changing family structure [7]. Dynamic family structures in China could influence syphilis transmission through a number of distinct mechanisms. Increases in the number of poor, uneducated men who are unable to find brides (“surplus men”) could lead to an increased demand for unsafe sex [8]. Rises in divorce could also contribute to the expansion of syphilis [7]. In recent years the easing of China’s One-Child Policy has created more families with multi-sibling families [9].

There are several potential mechanisms whereby sibling position (or birth order) could directly or indirectly contribute to increased sexual risk behaviors. Later born siblings receive less parental investment and consequently have less education [10-12], less income [13 14], and worse health [15 16] compared to their earlier born counterparts. The trend towards lower socioeconomic status could increase sexual risk behaviors among later born siblings. Studies among American adolescents have suggested that later born siblings have increased sexual risk behaviors [17-19], but there have not been similar research studies among adults. Men with older brothers have a substantially higher chance of being homosexual [20-22], another potential mechanism linking sibling position and sexual behaviors.

Given rapid changes in Chinese family structure and social dynamics, understanding the influence of demographic variables such as sibling position on sexual risk behaviors is important.



1  
2  
3 The purpose of this study was to examine the effect of sibling position on history of STIs and  
4 syphilis among a sample of clinic patients in South China.  
5  
6  
7  
8  
9

## 10 11 12 **Methods**

13  
14  
15 This study recruited STI outpatients in China as part of the larger Plum Blossom Study  
16 which has been previously described [23]. Briefly, public STI clinics in four sites of the Pearl  
17 River Delta region of Guangdong Province were selected using a probability proportional-to-size  
18 sampling method [23]. All clinic patients were invited to participate and information about those  
19 who refused to participate was also collected.  
20  
21  
22  
23  
24  
25  
26

27 A written survey for public STI outpatients was field tested among 12 patients in one of  
28 the cities. The survey had 58 items, with most items coming from the China Health and Family  
29 Life Survey, a population-representative study of sexual behaviors in China [24]. The survey  
30 included domains on sociodemographic information, sexual behaviors, and sibling position. STI  
31 history was a dichotomized variable based on asking about a history of each of the following  
32 infections: syphilis, gonorrhea, chlamydia, condyloma acuminata, NGU/cervicitis, genital  
33 herpes, or another STI. The sibling position question asked about the total number of younger  
34 brothers, younger sisters, older brothers, and older sisters in their family. An only child would  
35 be coded "0-0-0-0" since they have zero of each of these types of siblings.  
36  
37  
38  
39  
40  
41  
42  
43  
44  
45  
46  
47

48 From September 2009 until January 2010, potential study subjects were recruited by  
49 physicians and nurses at selected STI clinics. All clinic patients older than 17 years old were  
50 eligible for participation, regardless of their interest in receiving syphilis testing. Potential  
51 participants were referred to a separate, quiet room to speak with a research assistant about  
52  
53  
54  
55  
56  
57  
58  
59  
60

1  
2  
3 joining the study. Participation in the survey was voluntary and no incentives were given to  
4  
5 patients to participate in the study. Those who agreed to participate in the study were given STI  
6  
7 counseling after providing verbal informed consent to a trained research assistant. Clinic  
8  
9 patients were offered testing and then entered the study.  
10  
11

12  
13 All participants had approximately five mL of venous blood taken for treponemal syphilis  
14  
15 testing. All samples had subsequent nontreponemal confirmation and those with syphilis  
16  
17 infection received treatment according to standard guidelines.  
18  
19

20 The primary outcome of the study was having a positive treponemal syphilis serology.  
21  
22 Missing values accounted for less than 10% of all the respective independent variables.  
23  
24 Occupation was dichotomized into entertainment and non-entertainment based on earlier work  
25  
26 supporting higher sexual risk behaviors at entertainment establishments [25]. First-borns were  
27  
28 categorized as being either the eldest or only children. Middle-borns had at least one elder sibling  
29  
30 and one younger sibling. Final-borns included those with at least one older sibling and no  
31  
32 younger siblings. These three categories were based on sociology and psychology literature [26  
33  
34 27] suggesting that sibling positions influence behaviors, including sexual behaviors.  
35  
36 Multicollinearity was assessed by calculating the variance inflation factor (VIF) and excluding  
37  
38 factors with a VIF over 5. Bivariate relationships were analyzed and unadjusted odds ratios with  
39  
40 95% confidence intervals were reported. Bivariate relationships were calculated for all  
41  
42 participants, only men, and only women. Multivariate logistic regression models for men and  
43  
44 women respectively were developed by taking all bivariate relationships found to be associated  
45  
46 with syphilis infection with  $p < 0.10$ .  
47  
48  
49  
50  
51  
52

53 This research protocol and consent procedure was approved by the Medical Ethics  
54  
55 Committee of Chinese Academy of Medical Sciences Institute of Dermatology (Nanjing, China),  
56  
57  
58  
59  
60

1  
2  
3 the University of North Carolina Institutional Review Board (Chapel Hill, USA), and the  
4  
5 Partners Committee on Human Subjects Research (Boston, USA).  
6  
7  
8  
9

## 10 **Results**

11  
12  
13 A total of 1792 eligible individuals (consenting clinic patients older than 17 years old)  
14 participated in this study. This included 1163 men and 626 women. Details of the 271 (13.1%)  
15 who refused to participate have been described elsewhere [23]. Most clinic patients were 40  
16 years old or younger, men, unmarried, had an annual income of equal to or less than 3700 USD,  
17 had education less than or equal to high school, and were not working in the entertainment  
18 industry (Table 1). Among all clinic patients, 824 (46.3%) were first-born, 354 (19.9%) were  
19 middle-born, and 602 (33.8%) were final-born. Among the first-born individuals, 187 were only  
20 children and 655 had siblings. HIV risk behaviors are reported in Table 2. 721 (40.3%) of  
21 individuals reported having a history of a sexually transmitted infection.  
22  
23  
24  
25  
26  
27  
28  
29  
30  
31  
32  
33  
34  
35

36 Among the 1792 participants, 1280 (71.4%) had never been tested for syphilis infection  
37 in the past. A total of 1705 (95.1%) of patients were willing to be tested for syphilis infection  
38 and 1702 (95.0%) accepted testing. A total of 139 (7.8%) of individuals had a positive syphilis  
39 test. Most clinic patients (1037, 63.6%) reported not using a condom during the last episode of  
40 sex with their non-primary sex partner. Relatively few clinic patients reported a history of  
41 injecting drug use or same-sex behavior (Table 2).  
42  
43  
44  
45  
46  
47  
48  
49  
50

51 Among all clinic patients (N = 1792), the following factors were significantly associated  
52 with syphilis in univariate analyses: middle-born (OR 1.72, 95% CI 1.24-2.63) compared to  
53 being first-born or final-born; women (OR 2.36, 95% CI 1.67-3.35) compared to men; unmarried  
54  
55  
56  
57  
58  
59  
60

1  
2  
3 (OR 2.35, 95% CI 1.54-3.60) compared to married; education greater than high school (OR 1.66,  
4  
5 95% CI 1.17-2.36) compared to high school or less education; not living in Site D (OR 0.36,  
6  
7 95% CI 0.18-0.72) compared to living in the other cities; ever engaged in commercial sex (OR  
8  
9 1.81, -1.16-2.94) compared to never having engaged in commercial sex; and history of  
10  
11 intravenous drug use (OR 5.86, 95% CI 1.74-19.73). Middle-born sibling position was also  
12  
13 associated with a higher percentage of reported STI history (44.7% compared to 34.7%,  $p <$   
14  
15 0.001). Being middle-born was not associated with reporting homosexual behaviors ( $p = 0.4$ ).  
16  
17  
18  
19

20  
21 The multivariate model predicting syphilis among male clinic patients ( $N = 1163$ )  
22  
23 included higher education, not living in Site D, and ever engaging in commercial sex (Table 3).  
24  
25 Sibling position, age, marital status, and IDU history were not in the final model. Middle-born  
26  
27 sibling position was significantly related to ever engaging in commercial sex. The multivariate  
28  
29 model predicting syphilis among female clinic patients ( $N = 626$ ) included unmarried, higher  
30  
31 education, and not living in Site D (Table 4).  
32  
33  
34  
35  
36  
37  
38

## 39 Discussion

40  
41  
42 The resurgent syphilis epidemic in China forces broader thinking and action about this  
43  
44 ancient pathogen. Changing family structure, perhaps through its social and economic effects on  
45  
46 individuals, may have important implications for the expansion of syphilis [6]. To our  
47  
48 knowledge, this is the first study to examine the sexual risk behaviors of adults according to  
49  
50 sibling position. Easing of China's One Child Policy has already resulted in greater multi-sibling  
51  
52 families and this trend is likely to increase over time [9]. Both sexual preference and socio-  
53  
54 economic status are known to vary according to sibling position and may contribute to  
55  
56  
57  
58  
59  
60

1  
2  
3 differential sexual risk behaviors. Our finding that Site D had a lower burden of syphilis among  
4 men and women is striking, but the low number of sites (n=4) precluded a more formal analysis  
5 of site-level characteristics associated with syphilis infection. More comprehensive STI control  
6 services in Site D prior to this research project may have contributed to this trend.  
7  
8  
9  
10  
11

12  
13 Our results suggest that middle-born men have a higher risk of STI history and a greater  
14 risk of purchasing sex. The relationship between middle-born and history of syphilis was  
15 independent of self-reported homosexuality, income, and education levels. However, middle  
16 sibling position was not in the final multivariate model because it was associated with ever  
17 having had commercial sex. Adolescent research from the United States has suggested that later  
18 sibling positions have an increased sexual risk behaviors [17-19]. This effect in adolescents is  
19 thought to be related to the influence of having sexually active older siblings who influence their  
20 younger brothers and sisters [28 29] or relatively less psychological support from parents [30].  
21 The trend of middle-born individuals having a higher risk of STIs and purchasing sex could be  
22 related to persistence of the effect found in adolescence. Psychological attributes associated with  
23 individuals who are middle siblings (e.g., more relaxed attitude [26]) may also establish a  
24 context for increased sexual risk taking.  
25  
26  
27  
28  
29  
30  
31  
32  
33  
34  
35  
36  
37  
38  
39  
40  
41  
42

43 Our finding that more highly educated women are more likely to have syphilis infection  
44 contrasts with studies of other STIs among Chinese women. For example, a population-  
45 representative study of chlamydia in China found that women who had less education were more  
46 likely to have chlamydia [24] and this trend has been found in a number of other studies [31-33].  
47 The observed association between higher education and syphilis among women in our study,  
48 however, is consistent with previous research that demonstrated greater syphilis risk among  
49 Chinese men with more education [7 24]. Groups of high-income men in China often  
50  
51  
52  
53  
54  
55  
56  
57  
58  
59  
60

1  
2  
3 incorporate visits to sex venues as part of business banquets, using such opportunities to  
4 establish, maintain, and extend social relationships critical for work – and potentially increasing  
5 risk of STI transmission to their wives [34].  
6  
7  
8  
9

10  
11 There are several important limitations in this study. First, our study was not a  
12 population-based sample and so generalizations should be made with caution. Second, our study  
13 was only cross-sectional and so the cumulative sexual risk could not be captured within a single  
14 syphilis measurement. Third, this study only examined public STI clinics but did not explore  
15 private clinics where a subset of high-risk men probably seek sexual health services. However,  
16 public clinics are the most common source of clinical STI service [24] and the only sector with  
17 the physician, laboratory, and nurse capacity to undertake research.  
18  
19  
20  
21  
22  
23  
24  
25  
26  
27

28  
29 Major family and social changes underway in China are likely to influence sexual risk  
30 behaviors and the extent to which unsafe commercial sex becomes normalized. Social  
31 determinants may have an impact at multiple levels – family, neighborhood, city, and higher  
32 levels of organization. Better understanding the social context of STDs, such as family  
33 structures, can help us to inform structural interventions focused on improving sexual health.  
34 For example, the finding that younger male siblings have a higher sexual risk could be used to  
35 target younger male siblings in STD control social marketing campaigns. A tailored approach to  
36 reaching subsets of high-risk groups has been effective in other settings [35 36]. Further research  
37 on the social determinants of sexual health is needed.  
38  
39  
40  
41  
42  
43  
44  
45  
46  
47  
48  
49  
50  
51  
52  
53  
54  
55  
56  
57  
58  
59  
60

## References

1. Chen ZQ, Zhang GC, Gong XD, et al. Syphilis in China: results of a national surveillance programme. *Lancet* 2007;**369**(9556):132-8 doi: S0140-6736(07)60074-9 [pii]  
10.1016/S0140-6736(07)60074-9[published Online First: Epub Date] |.
2. Tucker JD, Chen XS, Peeling RW. Syphilis and social upheaval in China. *N Engl J Med* 2010;**362**(18):1658-61 doi: 362/18/1658 [pii]  
10.1056/NEJMp0911149[published Online First: Epub Date] |.
3. Tucker JD, Cohen MS. China's syphilis epidemic: epidemiology, proximate determinants of spread, and control responses. *Curr Opin Infect Dis* 2011;**24**(1):50-5 doi: 10.1097/QCO.0b013e32834204bf[published Online First: Epub Date] |.
4. Shahmanesh M, Cowan F, Wayal S, et al. The burden and determinants of HIV and sexually transmitted infections in a population-based sample of female sex workers in Goa, India. *Sex Transm Infect* 2009;**85**(1):50-9 doi: 10.1136/sti.2008.030767[published Online First: Epub Date] |.
5. Lopez-De Fede A, Stewart JE, Hardin JW, et al. Spatial visualization of multivariate datasets: an analysis of STD and HIV/AIDS diagnosis rates and socioeconomic context using ring maps. *Public Health Rep* 2011;**126 Suppl 3**:115-26
6. Tucker JD, Henderson GE, Wang TF, et al. Surplus men, sex work, and the spread of HIV in China. *AIDS* 2005;**19**(6):539-47 doi: 00002030-200504080-00001 [pii][published Online First: Epub Date] |.
7. Tan NX, Messina JP, Yang LG, et al. A Spatial Analysis of County-level Variation in Syphilis and Gonorrhoea in Guangdong Province, China. *PloS one* 2011;**6**(5):e19648 doi: 10.1371/journal.pone.0019648[published Online First: Epub Date] |.
8. Tucker JD, Poston D, Qiang R. *Gender policy and HIV in China : catalyzing policy change*. 1st ed. New York: Springer, 2009.
9. Wang C. History of the Chinese Family Planning program: 1970-2010. *Contraception* 2011 doi: 10.1016/j.contraception.2011.10.013[published Online First: Epub Date] |.
10. Downey DB. Number of siblings and intellectual development. The resource dilution explanation. *The American psychologist* 2001;**56**(6-7):497-504
11. Zajonc RB. Family configuration and intelligence. *Science* 1976;**192**(4236):227-36 doi: 10.1126/science.192.4236.227[published Online First: Epub Date] |.
12. Steelman LC, Powell B, Werum R, et al. Reconsidering the Effects of Sibling Configuration: Recent Advances and Challenges. *Annual Review of Sociology* 2002;**28**:243-69
13. Keister LA. Sharing the wealth: the effect of siblings on adults' wealth ownership. *Demography* 2003;**40**(3):521-42
14. Keister LA, Keister LA. Race, family structure, and wealth: the effect of childhood family on adult asset ownership. *Sociological Perspectives* 2004;**47**:161-87
15. Nicolaou NC, Simpson A, Lowe LA, et al. Day-care attendance, position in sibship, and early childhood wheezing: a population-based birth cohort study. *The Journal of allergy and clinical immunology* 2008;**122**(3):500-6 e5 doi: 10.1016/j.jaci.2008.06.033[published Online First: Epub Date] |.
16. Lawson DW, Mace R. Sibling configuration and childhood growth in contemporary British families. *International journal of epidemiology* 2008;**37**(6):1408-21 doi: 10.1093/ije/dyn116[published Online First: Epub Date] |.
17. Rodgers JL, Rowe DC. Influence of siblings on adolescent sexual behavior. *Developmental Psychology* 1988;**24**:722-28

- 1  
2  
3  
4  
5  
6  
7  
8  
9  
10  
11  
12  
13  
14  
15  
16  
17  
18  
19  
20  
21  
22  
23  
24  
25  
26  
27  
28  
29  
30  
31  
32  
33  
34  
35  
36  
37  
38  
39  
40  
41  
42  
43  
44  
45  
46  
47  
48  
49  
50  
51  
52  
53  
54  
55  
56  
57  
58  
59  
60
18. Reiss IL. *The social context of premarital sexual permissiveness*. New York: Holt, Rinehart & Winston, 1967
  19. Rodgers JL. Family configuration and adolescent sexual behavior. *Population and Environment* 1983;**6**:73-83
  20. Bogaert AF. Biological versus nonbiological older brothers and men's sexual orientation. *Proc Natl Acad Sci U S A* 2006;**103**(28):10771-4 doi: 10.1073/pnas.0511152103[published Online First: Epub Date]].
  21. Schwartz G, Kim RM, Kolundzija AB, et al. Biodemographic and physical correlates of sexual orientation in men. *Arch Sex Behav* 2010;**39**(1):93-109 doi: 10.1007/s10508-009-9499-1[published Online First: Epub Date]].
  22. Puts DA, Jordan CL, Breedlove SM. O brother, where art thou? The fraternal birth-order effect on male sexual orientation. *Proc Natl Acad Sci U S A* 2006;**103**(28):10531-2 doi: 10.1073/pnas.0604102103[published Online First: Epub Date]].
  23. Tucker JD, Yang LG, Yang B, et al. A Twin Response to Twin Epidemics: Integrated HIV/Syphilis Testing at STI clinics in South China. *J Acquir Immune Defic Syndr* 2011 doi: 10.1097/QAI.0b013e31821d3694[published Online First: Epub Date]].
  24. Parish WL, Laumann EO, Cohen MS, et al. Population-based study of chlamydial infection in China: a hidden epidemic. *JAMA* 2003;**289**(10):1265-73 doi: 10.1007/s10508-008-9311-7[published Online First: Epub Date]].
  25. Li L, Wu Z, Rotheram-Borus MJ, et al. Visiting entertainment venues and sexual health in China. *Arch Sex Behav* 2009;**38**(5):814-20 doi: 10.1007/s10508-008-9311-7[published Online First: Epub Date]].
  26. Sulloway FJ. *Born to rebel : birth order, family dynamics, and creative lives*. 1st Vintage Books ed. New York: Vintage Books, 1997.
  27. Toman W. *Family constellation; theory and practice of a psychological game. Drawings [by] Miné Okubo*. New York,: Springer Pub. Co., 1961.
  28. Miller BC, Benson B, Galbraith KA. Family Relationships and Adolescent Pregnancy Risk: A Research Synthesis. *Developmental Review* 2001;**21**:1-38
  29. Rwenge M. Sexual Risk Behaviors Among Young People In Bamenda, Cameroon. *International Family Planning Perspectives* 2000;**26**:118-23
  30. Terada T, Kasai M, Asano K. Psychological support for junior high school students: sibling order and sex. *Psychol Rep* 2006;**99**(1):179-90
  31. Li Y, Detels R, Lin P, et al. Difference in Risk Behaviors and STD Prevalence Between Street-Based and Establishment-Based FSWs in Guangdong Province, China. *AIDS and behavior* 2012 doi: 10.1007/s10461-011-0102-0[published Online First: Epub Date]].
  32. Lu F, Jia Y, Sun X, et al. Prevalence of HIV infection and predictors for syphilis infection among female sex workers in southern China. *The Southeast Asian journal of tropical medicine and public health* 2009;**40**(2):263-72
  33. Lu F, Jia Y, Bin S, et al. Predictors for casual sex and/or infection among sexually transmitted disease clinic attendees in China. *International journal of STD & AIDS* 2009;**20**(4):241-8 doi: 10.1258/ijsa.2008.008290[published Online First: Epub Date]].
  34. Uretsky E. 'Mobile men with money': the socio-cultural and politico-economic context of 'high-risk' behaviour among wealthy businessmen and government officials in urban China. *Cult Health Sex* 2008;**10**(8):801-14 doi: 10.1080/13691050802380966[published Online First: Epub Date]].
  35. Bellis JM, Grimley DM, Alexander LR. Feasibility of a tailored intervention targeting STD-related behaviors. *American journal of health behavior* 2002;**26**(5):378-85



1  
2  
3  
4  
5  
6  
7  
8  
9  
10  
11  
12  
13  
14  
15  
16  
17  
18  
19  
20  
21  
22  
23  
24  
25  
26  
27  
28  
29  
30  
31  
32  
33  
34  
35  
36  
37  
38  
39  
40  
41  
42  
43  
44  
45  
46  
47  
48  
49  
50  
51  
52  
53  
54  
55  
56  
57  
58  
59  
60

36. Herbst JH, Sherba RT, Crepaz N, et al. A meta-analytic review of HIV behavioral interventions for reducing sexual risk behavior of men who have sex with men. *J Acquir Immune Defic Syndr* 2005;**39**(2):228-41

For peer review only

### Financial Disclosure

This work was supported by an NIH Fogarty K01 Award (US NIH 1K01TW008200-01A1), the UNC Fogarty AIDS International Research and Training Program (NIH FIC D43 TW01039), the WHO Rapid Syphilis Test Project (UNICEF/UNDP/World Bank/WHO A70577), the Harvard Institute for Global Health, and a Burroughs Wellcome Fund/American Society of Tropical Medicine and Hygiene Wellcome Postdoctoral Fellowship in Tropical Infectious Diseases. The funders had no role in the study design, data collection and analysis, decision to publish, or preparation of the manuscript.

### Author Contributions

Conceived and designed the study: JDT, LY, BY. Performed the analysis: JDT, DY. Analyzed the data: LY, BY, JDT, AA. Contributed analysis tools: AA, BY. Wrote the paper: JDT, DY, LY, BY, AA.

### Competing interest

We declare that we have no conflicts of interest.

### Ethics Statement

All participants received verbal informed consent prior to participation. Verbal consent was used because of the minimal risk associated with participating in this study and documented by the research assistant who enrolled the patient in the study. This research protocol and consent procedure was approved by the Medical Ethics Committee of Chinese Academy of Medical

1  
2  
3  
4  
5  
6  
7  
8  
9  
10  
11  
12  
13  
14  
15  
16  
17  
18  
19  
20  
21  
22  
23  
24  
25  
26  
27  
28  
29  
30  
31  
32  
33  
34  
35  
36  
37  
38  
39  
40  
41  
42  
43  
44  
45  
46  
47  
48  
49  
50  
51  
52  
53  
54  
55  
56  
57  
58  
59  
60

Sciences Institute of Dermatology (Nanjing, China), the University of North Carolina  
Institutional Review Board (Chapel Hill, USA), and the Partners Committee on Human Subjects  
Research (Boston, USA).

For peer review only

**Table 1. Socio-demographic correlates and bivariate relationships with syphilis among all clinic patients (N = 1792).**

| Socio-demographic Variables |                   | No. (%)      | No. Positive for Syphilis, (%) | Unadjusted OR (95% CI) |
|-----------------------------|-------------------|--------------|--------------------------------|------------------------|
| <b>Sibling Position</b>     | First-born        | 824 (46.3)   | 57 (3.4)                       | 1                      |
|                             | Middle-born       | 354 (19.9)   | 40 (12.0)                      | 1.72 (1.24-2.63)       |
|                             | Final-born        | 602 (33.8)   | 41 (7.1)                       | 0.98 (0.64-1.47)       |
| <b>Age</b>                  | >40 years old     | 412 (23.0)   | 41(10.5)                       | 1                      |
|                             | ≤40 years old     | 1380 (77.0)  | 98 (7.5)                       | 0.69(.47-1.01)         |
| <b>Sex</b>                  | Male              | 1163 (65.0)  | 63 (5.8)                       | 1                      |
|                             | Female            | 626 (35.0)   | 76 (12.6)                      | 2.36 (1.67-3.35)       |
| <b>Marital Status</b>       | Married           | 624 (37.9)   | 29 (4.7)                       | 1                      |
|                             | Unmarried         | 1021 (62.1)  | 105 (10.3)                     | 2.35 (1.54-3.60)       |
| <b>Annual Income</b>        | ≤ 3700 USD        | 882 (57.5)   | 79 (9.0)                       | 1                      |
|                             | >3700 USD         | 651 (42.5)   | 42 (6.5)                       | 0.70 (0.48-1.03)       |
| <b>Education Completed</b>  | ≤ High school     | 1054 (62.8)  | 70 (6.6)                       | 1                      |
|                             | > High school     | 625 (37.2)   | 66 (10.6)                      | 1.66 (1.17 – 2.36)     |
| <b>Site</b>                 | Site A            | 355 (20.9)   | 36 (10.1)                      | 1                      |
|                             | Site B            | 453 (26.7)   | 34 (7.5)                       | 0.72 (0.44-1.18)       |
|                             | Site C            | 608 (35.8)   | 58 (9.5)                       | 0.93 (0.60-1.45)       |
|                             | Site D            | 283 (16.7)   | 11 (3.9)                       | 0.36 (0.18-0.72)       |
| <b>Occupation</b>           | Entertainment     | 69 (4.1)     | 7 (10.1)                       | 1                      |
|                             | Non-entertainment | 1604 (95.88) | 129 (8.0)                      | 0.78 (0.35 – 1.73)     |

**Table 2. HIV risk behaviors among all clinic patients (N = 1792).**

| Risk Behaviors                                        |     | No. (%)     | No. Positive for Syphilis, (%) | Unadjusted OR (95% CI) |
|-------------------------------------------------------|-----|-------------|--------------------------------|------------------------|
| <b>Condom use for non-primary partner<sup>1</sup></b> | Yes | 593 (36.4)  | 43 (7.3)                       | 1                      |
|                                                       | No  | 1037 (63.6) | 92 (8.8)                       | 1.25 (0.85-1.82)       |
| <b>Ever engaged in commercial sex</b>                 | No  | 1137 (70.8) | 24 (5.1)                       | 1                      |
|                                                       | Yes | 468 (29.2)  | 103 (9.1)                      | 1.81 (1.16-2.94)       |
| <b>IDU history</b>                                    | No  | 1667 (99.3) | 131 (7.9)                      | 1                      |
|                                                       | Yes | 12 (.7)     | 4 (33.3)                       | 5.86 (1.74-19.73)      |
| <b>Ever engaged in MSM activities<sup>2</sup></b>     | No  | 1057(98.5)  | 61 (5.8)                       | 1                      |
|                                                       | Yes | 16 (1.5)    | 1 (6.3)                        | 1.09 (0.14-8.38)       |

<sup>1</sup>During the last sex with non-primary partner, did you use a condom?

<sup>2</sup>Analysis restricted to men only.

**Table 3. Multivariate model predicting syphilis among all male clinic patients (N =1163).**

| <b>Predictor</b>                      |               | <b>Adjusted OR<br/>(95% CI)</b> |
|---------------------------------------|---------------|---------------------------------|
| <b>Sibling position</b>               | First-born    | 1                               |
|                                       | Middle-born   | 1.58 (0.77-3.28)                |
|                                       | Final-born    | 0.99 (0.50-1.96)                |
| <b>Age</b>                            | >40 years old | 1                               |
|                                       | ≤40 years old | 0.59 (0.32-1.09)                |
| <b>Marital Status</b>                 | Married       | 1                               |
|                                       | Unmarried     | 2.13 (0.89-2.84)                |
| <b>Education</b>                      | ≤ High school | 1                               |
|                                       | > High school | 1.59 (1.20-3.47)                |
| <b>Site</b>                           | Site A        | 1                               |
|                                       | Site B        | 0.90 (0.43-1.88)                |
|                                       | Site C        | 0.69 (0.35-1.37)                |
|                                       | Site D        | 0.21 (.06-0.73)                 |
| <b>Ever engaged in commercial sex</b> | No            | 1                               |
|                                       | Yes           | 1.90 (1.04-3.50)                |
| <b>IDU history</b>                    | No            | 1                               |
|                                       | Yes           | 4.44 (0.05-39.98)               |

Table 4. Multivariate model predicting syphilis among all female clinic patients (N = 626).

| Predictor                             |               | Adjusted OR<br>(95% CI) |
|---------------------------------------|---------------|-------------------------|
| <b>Sibling position</b>               | First-born    | 1                       |
|                                       | Middle-born   | 1.21 (0.63-2.32)        |
|                                       | Final-born    | 0.90 (0.47-1.73)        |
| <b>Age</b>                            | >40 years old | 1                       |
|                                       | ≤40 years old | 1.17 (0.57-2.43)        |
| <b>Marital Status</b>                 | Married       | 1                       |
|                                       | Unmarried     | 2.62 (1.38-4.96)        |
| <b>Education</b>                      | ≤ High school | 1                       |
|                                       | > High school | 1.77 (1.01-3.12)        |
| <b>Site</b>                           | Site A        | 1                       |
|                                       | Site B        | 0.46 (0.21-1.00)        |
|                                       | Site C        | 0.78 (0.38-1.61)        |
|                                       | Site D        | 0.22 (0.09-0.56)        |
| <b>Ever engaged in commercial sex</b> | No            | 1                       |
|                                       | Yes           | 0.97 (0.40-2.37)        |

1  
2  
3  
4  
5  
6  
7  
8  
9  
10  
11  
12  
13  
14 Social Determinants of Syphilis in South China: The Effect of Sibling Position on Syphilis and  
15 Sexual Risk Behaviors

16  
17  
18  
19 Research Article

20  
21  
22  
23 Joseph D Tucker<sup>1,2,3</sup>, Darwin Young<sup>2</sup>, Ligang Yang<sup>3</sup>, Bin Yang<sup>3</sup>, Adaora A Adimora<sup>2</sup>

24  
25 <sup>1</sup>University of North Carolina Project-China, Number 2 Lujing Road, Guangzhou, China

26  
27 <sup>2</sup>Division of Infectious Diseases, School of Medicine, UNC Chapel Hill, Chapel Hill, USA

28  
29 <sup>3</sup>Guangdong Provincial STD Control Center, Number 2 Lujing Road, Guangzhou, China

30  
31  
32 Corresponding author:

33 Joseph D. Tucker, MD, MA

34 Director, UNC Project – China

35  
36 Number 2 Lujing Road, Guangzhou, China, Tel: (86) 13560294997, Email:  
37 jdtucker@med.unc.edu  
38  
39  
40  
41  
42  
43  
44  
45  
46  
47  
48  
49  
50  
51  
52  
53  
54  
55  
56  
57  
58  
59  
60



1  
2  
3  
4  
5  
6  
7  
8  
9  
10  
11  
12  
13  
14  
15  
16  
17  
18  
19  
20  
21  
22  
23  
24  
25  
26  
27  
28  
29  
30  
31  
32  
33  
34  
35  
36  
37  
38  
39  
40  
41  
42  
43  
44  
45  
46  
47  
48  
49  
50  
51  
52  
53  
54  
55  
56  
57  
58  
59  
60

Objective: This study evaluated the relationship between sibling position and sexual risk based on behavioral and syphilis infection data from sexually transmitted infection (STI) patients in South China.

Design: Cross-sectional study examining sexual behaviors and syphilis infection.

Setting: Four STI clinics in the Pearl River Delta of South China.

Participants: 1792 Chinese men and women attending STI clinics.

Primary Outcome Measures: STI history, syphilis infection defined as positive nontreponemal and treponemal tests.

Results: Among all [STI-clinic](#) patients, 824 (46.3%) were first-born, 354 (19.9%) were middle-born, and 602 (33.8%) were final-born. Middle-born individuals had a higher percentage of reported STI history (44.7% compared to 34.7%,  $p < 0.001$ ) and syphilis infection (9.7% compared to 4.9%,  $p = 0.01$ ) among men ([n=1163](#)) compared to other sibling positions in bivariate analyses, [but not in the final multivariate model](#). The relationship between sibling position and syphilis was independent of income and education level. There was no trend observed between middle-born position and female sexual risk behaviors ([n=626](#)). Higher education was significantly associated with syphilis among women and men in respective multivariate models.

Conclusion: This study suggests that middle-born men in China [may](#) have an increased sexual risk compared to other sibling positions. As Chinese family and social structures change, a more thorough understanding of how demographic factors influence sexual risk behaviors is needed.

1  
2  
3  
4  
5  
6  
7  
8  
9  
10  
11 Article Summary  
12

13  
14 Article Focus:

- 15 • Understanding the social and family changes that influence sexual risk behaviors are  
16 critical for designing effective STD control responses.  
17  
18
- 19 • Few studies have examined the influence of sibling position on sexual risk behaviors.  
20  
21  
22

23  
24  
25  
26 Key Messages:

- 27 • Middle-born South Chinese men have an increased sexual risk compared to other sibship  
28 positions and this trend is not observed in women.  
29  
30
- 31 • The relationship between sibling position and sexual risk was not related to homosexual  
32 behavior, income, or education.  
33  
34
- 35 • Demographic changes in China related to family norms may have important implications  
36 for persistent syphilis transmission.  
37  
38  
39

40  
41  
42 Strengths and Limitations:

- 43 • This was a relatively large study in a region with an expanding syphilis epidemic, using  
44 biomarker and behavioral endpoints.  
45  
46
- 47 • More detailed information about sibling relationships was not collected as part of this  
48 research.  
49  
50  
51  
52  
53  
54

1  
2  
3  
4  
5  
6  
7  
8  
9  
10  
11  
12  
13  
14  
15  
16  
17  
18  
19  
20  
21  
22  
23  
24  
25  
26  
27  
28  
29  
30  
31  
32  
33  
34  
35  
36  
37  
38  
39  
40  
41  
42  
43  
44  
45  
46  
47  
48  
49  
50  
51  
52  
53  
54  
55  
56  
57  
58  
59  
60

## Introduction

Syphilis has made a marked resurgence across China [1 2], raising questions about social, economic, and other contextual factors that may contribute to transmission. Social determinants that likely drive onward syphilis transmission [3] include gender inequality [4], poverty [5], sex ratios [6], and changing family structure [7]. Dynamic family structures in China could influence syphilis transmission through a number of distinct mechanisms. Increases in the number of poor, uneducated men who are unable to find brides (“surplus men”) could lead to an increased demand for unsafe sex [8]. Rises in divorce could also contribute to the expansion of syphilis [7]. In recent years the easing of China’s One-Child Policy has created more families with multi-sibling families [9].

There are several potential mechanisms whereby sibling position (or birth order) could directly or indirectly contribute to increased sexual risk behaviors. Later born siblings receive less parental investment and consequently have less education [10-12], less income [13 14], and worse health [15 16] compared to their earlier born counterparts. The trend towards lower socio-economic status could increase sexual risk behaviors among later born siblings. Studies among American adolescents have suggested that later born siblings have increased sexual risk behaviors [17-19], but there have not been similar research studies among adults. Men with older brothers have a substantially higher chance of being homosexual [20-22], another potential mechanism linking sibling position and sexual behaviors.

Given rapid changes in Chinese family structure and social dynamics, understanding the influence of demographic variables such as sibling position on sexual risk behaviors is important.

1  
2  
3  
4  
5  
6  
7  
8  
9 The purpose of this study was to examine the effect of sibling position on history of STIs and  
10 syphilis among a sample of [STI-clinic](#) patients in South China.  
11  
12  
13

## 14 15 16 **Methods**

17  
18 This study recruited STI outpatients in China as part of the larger Plum Blossom Study  
19 which has been previously described [23]. Briefly, public STI clinics in four sites of the Pearl  
20 River Delta region of Guangdong Province were selected using a probability proportional-to-size  
21 sampling method [23]. All [STI-clinic](#) patients were invited to participate and information about  
22 those who refused to participate was also collected.  
23  
24  
25  
26

27  
28 A written survey for public STI outpatients was field tested among 12 patients in one of  
29 the cities. The survey had 58 items, with most items coming from the China Health and Family  
30 Life Survey, a population-representative study of sexual behaviors in China [24]. The survey  
31 included domains on sociodemographic information, sexual behaviors, and sibling position. [STI](#)  
32 [history was a dichotomized variable based on asking about a history of each of the following](#)  
33 [infections: syphilis, gonorrhoea, chlamydia, condyloma acuminata, NGU/cervicitis, genital](#)  
34 [herpes, or another STI.](#) The sibling position question asked about the total number of younger  
35 brothers, younger sisters, older brothers, and older sisters in their family. An only child would  
36 be coded “0-0-0-0” since they have zero of each of these types of siblings.  
37  
38  
39  
40  
41  
42  
43  
44

45 From September 2009 until January 2010, potential study subjects were recruited by  
46 physicians and nurses at selected STI clinics. All [STI-clinic](#) patients older than 17 years old were  
47 eligible for participation, regardless of their interest in receiving syphilis testing. Potential  
48 participants were referred to a separate, quiet room to speak with a research assistant about  
49  
50  
51  
52  
53  
54

1  
2  
3  
4  
5  
6  
7  
8  
9 joining the study. Participation in the survey was voluntary and no incentives were given to  
10 patients to participate in the study. Those who agreed to participate in the study were given STI  
11 counseling after providing verbal informed consent to a trained research assistant. [STI-Clinic](#)  
12 patients were offered testing and then entered the study.  
13  
14  
15

16 All participants had approximately five mL of venous blood taken for treponemal syphilis  
17 testing. All samples had subsequent nontreponemal confirmation and those with syphilis  
18 infection received treatment according to standard guidelines.  
19  
20  
21

22 The primary outcome of the study was having a positive treponemal syphilis serology.  
23 Missing values accounted for less than 10% of all the respective independent variables.  
24 Occupation was dichotomized into entertainment and non-entertainment based on earlier work  
25 supporting higher sexual risk behaviors at entertainment establishments [25]. First-borns were  
26 categorized as being either the eldest or only children. Middle-borns had at least one elder sibling  
27 and one younger sibling. Final-borns included those with at least one older sibling and no  
28 younger siblings. [These three categories were based on sociology and psychology literature \[26](#)  
29 [27\] suggesting that sibling positions influence behaviors, including sexual behaviors.](#)  
30  
31  
32  
33  
34  
35  
36  
37 Multicollinearity was assessed by calculating the variance inflation factor (VIF) and excluding  
38 factors with a VIF over 5. Bivariate relationships were analyzed and unadjusted odds ratios with  
39 95% confidence intervals were reported. Bivariate relationships were calculated for all  
40 participants, only men, and only women. Multivariate logistic regression models for men and  
41 women respectively were developed by taking all bivariate relationships found to be associated  
42 with syphilis infection with  $p < 0.10$ .  
43  
44  
45  
46  
47

48 This research protocol and consent procedure was approved by the Medical Ethics  
49 Committee of Chinese Academy of Medical Sciences Institute of Dermatology (Nanjing, China),  
50  
51  
52

1  
2  
3  
4  
5  
6  
7  
8  
9 the University of North Carolina Institutional Review Board (Chapel Hill, USA), and the  
10 Partners Committee on Human Subjects Research (Boston, USA).  
11

## 12 13 14 **Results**

15  
16  
17 A total of 1792 eligible individuals (consenting [STH-clinic](#) patients older than 17 years old)  
18 participated in this study. [This included 1163 men and 626 women.](#) Details of the 271 (13.1%)  
19 who refused to participate have been described elsewhere [23]. Most [STH-clinic](#) patients were  
20 40 years old or younger, men, unmarried, had an annual income of equal to or less than 3700  
21 USD, had education less than or equal to high school, and were not working in the entertainment  
22 industry (Table 1). Among all [STH-clinic](#) patients, 824 (46.3%) were first-born, 354 (19.9%)  
23 were middle-born, and 602 (33.8%) were final-born. [Among the first-born individuals, 187 were](#)  
24 [only children and 655 had siblings.](#) HIV risk behaviors are reported in Table 2. 721 (40.3%) of  
25 individuals reported having a history of a sexually transmitted infection.  
26  
27

28  
29  
30 Among the 1792 participants, 1280 (71.4%) had never been tested for syphilis infection  
31 in the past. A total of 1705 (95.1%) of patients were willing to be tested for syphilis infection  
32 and 1702 (95.0%) accepted testing. A total of 139 (7.8%) of individuals had a positive syphilis  
33 test. Most [clinicSTH](#) patients (1037, 63.6%) reported not using a condom during the last episode  
34 of sex with their non-primary sex partner. Relatively few [STH-clinic](#) patients reported a history  
35 of injecting drug use or same-sex behavior (Table 2).  
36  
37

38  
39  
40 Among all [STH-clinic](#) patients (N = 1792), the following factors were significantly  
41 associated with syphilis in univariate analyses: middle-born (OR 1.72, 95% CI 1.24-2.63)  
42 compared to being first-born or final-born; women (OR 2.36, 95% 1.67-3.35) compared to men;  
43  
44  
45  
46  
47  
48  
49  
50  
51  
52  
53  
54  
55  
56  
57  
58  
59  
60

1  
2  
3  
4  
5  
6  
7  
8  
9  
10  
11  
12  
13  
14  
15  
16  
17  
18  
19  
20  
21  
22  
23  
24  
25  
26  
27  
28  
29  
30  
31  
32  
33  
34  
35  
36  
37  
38  
39  
40  
41  
42  
43  
44  
45  
46  
47  
48  
49  
50  
51  
52  
53  
54  
55  
56  
57  
58  
59  
60

unmarried (OR 2.35, 95% CI 1.54-3.60) compared to married; education greater than high school (OR 1.66, 95% CI 1.17-2.36) compared to high school or less education; not living in Site D (OR 0.36, 95% CI 0.18-0.72) compared to living in the other cities; ever engaged in commercial sex (OR 1.81, -1.16-2.94) compared to never having engaged in commercial sex; and history of intravenous drug use (OR 5.86, 95% CI 1.74-19.73). Middle-born sibling position was also associated with a higher percentage of reported STI history (44.7% compared to 34.7%,  $p < 0.001$ ). Being middle-born was not associated with reporting homosexual behaviors ( $p = 0.4$ ).

The multivariate model predicting syphilis among male **STI-clinic** patients (N = 1163) included higher education, not living in Site D, and ever engaging in commercial sex (Table 3). Sibling position, age, marital status, and IDU history were not in the final model. Middle-born sibling position was significantly related to ever engaging in commercial sex. The multivariate model predicting syphilis among female **STI-clinic** patients (N = 626) included unmarried, higher education, and not living in Site D (Table 4).

## Discussion

The resurgent syphilis epidemic in China forces broader thinking and action about this ancient pathogen. Changing family structure, perhaps through its social and economic effects on individuals, may have important implications for the expansion of syphilis [6]. To our knowledge, this is the first study to examine the sexual risk behaviors of adults according to sibling position. Easing of China's One Child Policy has already resulted in greater multi-sibling families and this trend is likely to increase over time [9]. Both sexual preference and socio-economic status are known to vary according to sibling position and may contribute to

1  
2  
3  
4  
5  
6  
7  
8  
9 differential sexual risk behaviors. Our finding that Site D had a lower burden of syphilis among  
10 men and women is striking, but the low number of sites (n=4) precluded a more formal analysis  
11 of site-level characteristics associated with syphilis infection. More comprehensive STI control  
12 services in Site D prior to this research project may have contributed to this trend.  
13  
14  
15  
16

17 Our results suggest that middle-born men have a higher risk of STI history and a greater  
18 risk of purchasing sex. The relationship between middle-born and history of syphilis was  
19 independent of self-reported homosexuality, income, and education levels. However, middle  
20 sibling position was not in the final multivariate model because it was associated with ever  
21 having had commercial sex. Adolescent research from the United States has suggested that later  
22 sibling positions have an increased sexual risk behaviors [17-19]. This effect in adolescents is  
23 thought to be related to the influence of having sexually active older siblings who influence their  
24 younger brothers and sisters [28 29] or relatively less psychological support from parents [30].  
25 The trend of middle-born individuals having a higher risk of STIs and purchasing sex could be  
26 related to persistence of the effect found in adolescence. Psychological attributes associated with  
27 individuals who are middle siblings (e.g., more relaxed attitude [26]) may also establish a  
28 context for increased sexual risk taking.  
29  
30  
31  
32  
33  
34  
35  
36  
37  
38  
39

40 Our finding that more highly educated women are more likely to have syphilis infection  
41 contrasts with studies of other STIs among Chinese women. For example, a population-  
42 representative study of chlamydia in China found that women who had less education were more  
43 likely to have chlamydia [24] and this trend has been found in a number of other studies [31-33].  
44 The observed association between higher education and syphilis among women in our study,  
45 however, is consistent with previous research that demonstrated greater syphilis risk among  
46 Chinese men with more education [7 24]. Groups of high-income men in China often  
47  
48  
49  
50  
51  
52  
53  
54  
55  
56  
57  
58  
59  
60



1  
2  
3  
4  
5  
6  
7  
8  
9  
10  
11  
12  
13  
14  
15  
16  
17  
18  
19  
20  
21  
22  
23  
24  
25  
26  
27  
28  
29  
30  
31  
32  
33  
34  
35  
36  
37  
38  
39  
40  
41  
42  
43  
44  
45  
46  
47  
48  
49  
50  
51  
52  
53  
54  
55  
56  
57  
58  
59  
60

incorporate visits to sex venues as part of business banquets, using such opportunities to establish, maintain, and extend social relationships critical for work – and potentially increasing risk of STI transmission to their wives [34].

There are several important limitations in this study. First, our study was not a population-based sample and so generalizations should be made with caution. Second, our study was only cross-sectional and so the cumulative sexual risk could not be captured within a single syphilis measurement. Third, this study only examined public STI clinics but did not explore private clinics where a subset of high-risk men probably seek sexual health services. However, public clinics are the most common source of clinical STI service [24] and the only sector with the physician, laboratory, and nurse capacity to undertake research.

Major family and social changes underway in China are likely to influence sexual risk behaviors and the extent to which unsafe commercial sex becomes normalized. Social determinants may have an impact at multiple levels – family, neighborhood, city, and higher

levels of organization. Better understanding the social context of STDs, such as family structures, can help us to inform structural interventions focused on improving sexual health. For example, the finding that younger male siblings have a higher sexual risk could be used to target younger male siblings in STD control social marketing campaigns. A tailored approach to reaching subsets of high-risk groups has been effective in other settings [35 36]. Further research on the social determinants of sexual health is needed. A better understanding of how family structure influences sexual risk behavior is important for designing effective interventions.

Formatted: Font: (Default) Times New Roman, 12 pt, Not Italic

Formatted: Font: (Default) Times New Roman, 12 pt, Not Italic

Formatted: Font: (Default) Times New Roman, 12 pt, Not Italic

Formatted: Font: (Default) Times New Roman, 12 pt, Not Italic

Formatted: Font: (Default) Times New Roman, 12 pt, Not Italic

Formatted: Font: (Default) Times New Roman, 12 pt, Not Italic

## References

1. Chen ZQ, Zhang GC, Gong XD, et al. Syphilis in China: results of a national surveillance programme. *Lancet* 2007;**369**(9556):132-8 doi: S0140-6736(07)60074-9 [pii] 10.1016/S0140-6736(07)60074-9[published Online First: Epub Date]].
2. Tucker JD, Chen XS, Peeling RW. Syphilis and social upheaval in China. *N Engl J Med* 2010;**362**(18):1658-61 doi: 362/18/1658 [pii] 10.1056/NEJMp0911149[published Online First: Epub Date]].
3. Tucker JD, Cohen MS. China's syphilis epidemic: epidemiology, proximate determinants of spread, and control responses. *Curr Opin Infect Dis* 2011;**24**(1):50-5 doi: 10.1097/QCO.0b013e32834204bf[published Online First: Epub Date]].
4. Shahmanesh M, Cowan F, Wayal S, Copas A, Patel V, Mabey D. The burden and determinants of HIV and sexually transmitted infections in a population-based sample of female sex workers in Goa, India. *Sex Transm Infect* 2009;**85**(1):50-9 doi: 10.1136/sti.2008.030767[published Online First: Epub Date]].

1  
2  
3  
4  
5  
6  
7  
8  
9  
10  
11  
12  
13  
14  
15  
16  
17  
18  
19  
20  
21  
22  
23  
24  
25  
26  
27  
28  
29  
30  
31  
32  
33  
34  
35  
36  
37  
38  
39  
40  
41  
42  
43  
44  
45  
46  
47  
48  
49  
50  
51  
52  
53  
54  
55  
56  
57  
58  
59  
60

5. Lopez-De Fede A, Stewart JE, Hardin JW, Mayfield-Smith K, Sudduth D. Spatial visualization of multivariate datasets: an analysis of STD and HIV/AIDS diagnosis rates and socioeconomic context using ring maps. *Public Health Rep* 2011;**126 Suppl 3**:115-26
6. Tucker JD, Henderson GE, Wang TF, et al. Surplus men, sex work, and the spread of HIV in China. *AIDS* 2005;**19**(6):539-47 doi: 00002030-200504080-00001 [pii][published Online First: Epub Date]].
7. Tan NX, Messina JP, Yang LG, et al. A Spatial Analysis of County-level Variation in Syphilis and Gonorrhoea in Guangdong Province, China. *PloS one* 2011;**6**(5):e19648 doi: 10.1371/journal.pone.0019648[published Online First: Epub Date]].
8. Tucker JD, Poston D, Qiang R. *Gender policy and HIV in China : catalyzing policy change*. 1st ed. New York: Springer, 2009.
9. Wang C. History of the Chinese Family Planning program: 1970-2010. *Contraception* 2011 doi: 10.1016/j.contraception.2011.10.013[published Online First: Epub Date]].
10. Downey DB. Number of siblings and intellectual development. The resource dilution explanation. *The American psychologist* 2001;**56**(6-7):497-504
11. Zajonc RB. Family configuration and intelligence. *Science* 1976;**192**(4236):227-36 doi: 10.1126/science.192.4236.227[published Online First: Epub Date]].
12. Steelman LC, Powell B, Werum R, Carter S. Reconsidering the Effects of Sibling Configuration: Recent Advances and Challenges. *Annual Review of Sociology* 2002;**28**:243-69
13. Keister LA. Sharing the wealth: the effect of siblings on adults' wealth ownership. *Demography* 2003;**40**(3):521-42
14. Keister LA, Keister LA. Race, family structure, and wealth: the effect of childhood family on adult asset ownership. *Sociological Perspectives* 2004;**47**:161-87
15. Nicolaou NC, Simpson A, Lowe LA, Murray CS, Woodcock A, Custovic A. Day-care attendance, position in sibship, and early childhood wheezing: a population-based birth cohort study. *The Journal of allergy and clinical immunology* 2008;**122**(3):500-6 e5 doi: 10.1016/j.jaci.2008.06.033[published Online First: Epub Date]].
16. Lawson DW, Mace R. Sibling configuration and childhood growth in contemporary British families. *International journal of epidemiology* 2008;**37**(6):1408-21 doi: 10.1093/ije/dyn116[published Online First: Epub Date]].
17. Rodgers JL, Rowe DC. Influence of siblings on adolescent sexual behavior. *Developmental Psychology* 1988;**24**:722-28
18. Reiss IL. *The social context of premarital sexual permissiveness*. New York: Holt, Rinehart & Winston, 1967
19. Rodgers JL. Family configuration and adolescent sexual behavior. *Population and Environment* 1983;**6**:73-83
20. Bogaert AF. Biological versus nonbiological older brothers and men's sexual orientation. *Proc Natl Acad Sci U S A* 2006;**103**(28):10771-4 doi: 10.1073/pnas.0511152103[published Online First: Epub Date]].
21. Schwartz G, Kim RM, Kolundzija AB, Rieger G, Sanders AR. Biodemographic and physical correlates of sexual orientation in men. *Arch Sex Behav* 2010;**39**(1):93-109 doi: 10.1007/s10508-009-9499-1[published Online First: Epub Date]].
22. Puts DA, Jordan CL, Breedlove SM. O brother, where art thou? The fraternal birth-order effect on male sexual orientation. *Proc Natl Acad Sci U S A* 2006;**103**(28):10531-2 doi: 10.1073/pnas.0604102103[published Online First: Epub Date]].
23. Tucker JD, Yang LG, Yang B, et al. A Twin Response to Twin Epidemics: Integrated HIV/Syphilis Testing at STI clinics in South China. *J Acquir Immune Defic Syndr* 2011 doi: 10.1097/QAI.0b013e31821d3694[published Online First: Epub Date]].

- 1  
2  
3  
4  
5  
6  
7  
8  
9 24. Parish WL, Laumann EO, Cohen MS, et al. Population-based study of chlamydial infection in China: a  
10 hidden epidemic. *JAMA* 2003;**289**(10):1265-73 doi: joc30372 [pii][published Online First: Epub  
11 Date]].
- 12 25. Li L, Wu Z, Rotheram-Borus MJ, et al. Visiting entertainment venues and sexual health in China. *Arch*  
13 *Sex Behav* 2009;**38**(5):814-20 doi: 10.1007/s10508-008-9311-7[published Online First: Epub  
14 Date]].
- 15 26. Sulloway FJ. *Born to rebel : birth order, family dynamics, and creative lives*. 1st Vintage Books ed.  
16 New York: Vintage Books, 1997.
- 17 27. Toman W. *Family constellation; theory and practice of a psychological game. Drawings [by] Miné*  
18 *Okubo*. New York,: Springer Pub. Co., 1961.
- 19 28. Miller BC, Benson B, Galbraith KA. Family Relationships and Adolescent Pregnancy Risk: A Research  
20 Synthesis. *Developmental Review* 2001;**21**:1-38
- 21 29. Rwege M. Sexual Risk Behaviors Among Young People In Bamenda, Cameroon. *International Family*  
22 *Planning Perspectives* 2000;**26**:118-23
- 23 30. Terada T, Kasai M, Asano K. Psychological support for junior high school students: sibling order and  
24 sex. *Psychol Rep* 2006;**99**(1):179-90
- 25 31. Li Y, Detels R, Lin P, et al. Difference in Risk Behaviors and STD Prevalence Between Street-Based and  
26 Establishment-Based FSWs in Guangdong Province, China. *AIDS and behavior* 2012 doi:  
27 10.1007/s10461-011-0102-0[published Online First: Epub Date]].
- 28 32. Lu F, Jia Y, Sun X, et al. Prevalence of HIV infection and predictors for syphilis infection among female  
29 sex workers in southern China. *The Southeast Asian journal of tropical medicine and public*  
30 *health* 2009;**40**(2):263-72
- 31 33. Lu F, Jia Y, Bin S, et al. Predictors for casual sex and/or infection among sexually transmitted disease  
32 clinic attendees in China. *International journal of STD & AIDS* 2009;**20**(4):241-8 doi:  
33 10.1258/ijsa.2008.008290[published Online First: Epub Date]].
- 34 34. Uretsky E. 'Mobile men with money': the socio-cultural and politico-economic context of 'high-risk'  
35 behaviour among wealthy businessmen and government officials in urban China. *Cult Health Sex*  
36 2008;**10**(8):801-14 doi: 904931533 [pii]
- 37 10.1080/13691050802380966[published Online First: Epub Date]].
- 38 35. Bellis JM, Grimley DM, Alexander LR. Feasibility of a tailored intervention targeting STD-related  
39 behaviors. *American journal of health behavior* 2002;**26**(5):378-85
- 40 36. Herbst JH, Sherba RT, Crepaz N, et al. A meta-analytic review of HIV behavioral interventions for  
41 reducing sexual risk behavior of men who have sex with men. *J Acquir Immune Defic Syndr*  
42 2005;**39**(2):228-41
- 43  
44  
45  
46  
47  
48  
49  
50

#### 51 Financial Disclosure

52  
53  
54  
55  
56  
57  
58  
59  
60

1  
2  
3  
4  
5  
6  
7  
8  
9 This work was supported by an NIH Fogarty K01 Award (US NIH 1K01TW008200-01A1), the  
10 UNC Fogarty AIDS International Research and Training Program (NIH FIC D43 TW01039), the  
11 WHO Rapid Syphilis Test Project (UNICEF/UNDP/World Bank/WHO A70577), the Harvard  
12 Institute for Global Health, and a Burroughs Wellcome Fund/American Society of Tropical  
13 Medicine and Hygiene Wellcome Postdoctoral Fellowship in Tropical Infectious Diseases. The  
14 funders had no role in the study design, data collection and analysis, decision to publish, or  
15 preparation of the manuscript.  
16  
17  
18  
19  
20  
21  
22  
23  
24

#### 25 **Author Contributions**

26  
27  
28 Conceived and designed the study: JDT, LY, BY. Performed the analysis: JDT, DY. Analyzed  
29 the data: LY, BY, JDT, AA. Contributed analysis tools: AA, BY. Wrote the paper: JDT, DY,  
30 LY, BY, AA.  
31  
32  
33  
34  
35

#### 36 **Competing interest**

37  
38 We declare that we have no conflicts of interest.  
39  
40

#### 41 **Ethics Statement**

42  
43 All participants received verbal informed consent prior to participation. Verbal consent was used  
44 because of the minimal risk associated with participating in this study and documented by the  
45 research assistant who enrolled the patient in the study. This research protocol and consent  
46 procedure was approved by the Medical Ethics Committee of Chinese Academy of Medical  
47 Sciences Institute of Dermatology (Nanjing, China), the University of North Carolina  
48  
49  
50  
51  
52

Institutional Review Board (Chapel Hill, USA), and the Partners Committee on Human Subjects Research (Boston, USA).

**Table 1. Socio-demographic correlates and bivariate relationships with syphilis among all STI-clinic patients (N = 1792).**

| Socio-demographic Variables | No. (%)    | No. Positive for Syphilis, (%) | Unadjusted OR (95% CI) |   |
|-----------------------------|------------|--------------------------------|------------------------|---|
| <b>Sibling Position</b>     | First-born | 824 (46.3)                     | 57 (3.4)               | 1 |

|                                      |                   |              |            |                    |
|--------------------------------------|-------------------|--------------|------------|--------------------|
|                                      | Middle-born       | 354 (19.9)   | 40 (12.0)  | 1.72 (1.24-2.63)   |
|                                      | Final-born        | 602 (33.8)   | 41 (7.1)   | 0.98 (0.64-1.47)   |
| <b>Age</b>                           | >40 years old     | 412 (23.0)   | 41(10.5)   | 1                  |
|                                      | ≤40 years old     | 1380 (77.0)  | 98 (7.5)   | 0.69(.47-1.01)     |
| <b>Sex</b>                           | Male              | 1163 (65.0)  | 63 (5.8)   | 1                  |
|                                      | Female            | 626 (35.0)   | 76 (12.6)  | 2.36 (1.67-3.35)   |
| <b>Marital</b>                       | Married           | 624 (37.9)   | 29 (4.7)   | 1                  |
| <b>Status</b>                        | Unmarried         | 1021 (62.1)  | 105 (10.3) | 2.35 (1.54-3.60)   |
| <b>Annual</b><br><b>Income</b>       | ≤ 3700 USD        | 882 (57.5)   | 79 (9.0)   | 1                  |
|                                      | >3700 USD         | 651 (42.5)   | 42 (6.5)   | 0.70 (0.48-1.03)   |
| <b>Education</b><br><b>Completed</b> | ≤ High school     | 1054 (62.8)  | 70 (6.6)   | 1                  |
|                                      | > High school     | 625 (37.2)   | 66 (10.6)  | 1.66 (1.17 – 2.36) |
| <b>Site</b>                          | Site A            | 355 (20.9)   | 36 (10.1)  | 1                  |
|                                      | Site B            | 453 (26.7)   | 34 (7.5)   | 0.72 (0.44-1.18)   |
|                                      | Site C            | 608 (35.8)   | 58 (9.5)   | 0.93 (0.60-1.45)   |
|                                      | Site D            | 283 (16.7)   | 11 (3.9)   | 0.36 (0.18-0.72)   |
| <b>Occupation</b>                    | Entertainment     | 69 (4.1)     | 7 (10.1)   | 1                  |
|                                      | Non-entertainment | 1604 (95.88) | 129 (8.0)  | 0.78 (0.35 – 1.73) |

Table 2. HIV risk behaviors among all **STI-clinic** patients (N = 1792).

| Risk Behaviors                    |     | No. (%)     | No. Positive for Syphilis, (%) | Unadjusted OR (95% CI) |
|-----------------------------------|-----|-------------|--------------------------------|------------------------|
| <b>Condom use for non-primary</b> | Yes | 593 (36.4)  | 43 (7.3)                       | 1                      |
|                                   | No  | 1037 (63.6) | 92 (8.8)                       | 1.25 (0.85-1.82)       |

| partner <sup>1</sup>                        |     |             |           |                   |
|---------------------------------------------|-----|-------------|-----------|-------------------|
| Ever engaged in commercial sex              | No  | 1137 (70.8) | 24 (5.1)  | 1                 |
|                                             | Yes | 468 (29.2)  | 103 (9.1) | 1.81 (1.16-2.94)  |
| IDU history                                 | No  | 1667 (99.3) | 131 (7.9) | 1                 |
|                                             | Yes | 12 (.7)     | 4 (33.3)  | 5.86 (1.74-19.73) |
| Ever engaged in MSM activities <sup>2</sup> | No  | 1057(98.5)  | 61 (5.8)  | 1                 |
|                                             | Yes | 16 (1.5)    | 1 (6.3)   | 1.09 (0.14-8.38)  |

<sup>1</sup>During the last sex with non-primary partner, did you use a condom?

<sup>2</sup>Analysis restricted to men only.

Table 3. Multivariate model predicting syphilis among all male **STI-clinic** patients (N =1163).

| Predictor | Adjusted OR |
|-----------|-------------|
|-----------|-------------|



| (95% CI)                              |               |                   |
|---------------------------------------|---------------|-------------------|
| <b>Sibling position</b>               | First-born    | 1                 |
|                                       | Middle-born   | 1.58 (0.77-3.28)  |
|                                       | Final-born    | 0.99 (0.50-1.96)  |
| <b>Age</b>                            | >40 years old | 1                 |
|                                       | ≤40 years old | 0.59 (0.32-1.09)  |
| <b>Marital Status</b>                 | Married       | 1                 |
|                                       | Unmarried     | 2.13 (0.89-2.84)  |
| <b>Education</b>                      | ≤ High school | 1                 |
|                                       | > High school | 1.59 (1.20-3.47)  |
| <b>Site</b>                           | Site A        | 1                 |
|                                       | Site B        | 0.90 (0.43-1.88)  |
|                                       | Site C        | 0.69 (0.35-1.37)  |
|                                       | Site D        | 0.21 (.06-0.73)   |
| <b>Ever engaged in commercial sex</b> | No            | 1                 |
|                                       | Yes           | 1.90 (1.04-3.50)  |
| <b>IDU history</b>                    | No            | 1                 |
|                                       | Yes           | 4.44 (0.05-39.98) |

Table 4. Multivariate model predicting syphilis among all female **STI-clinic** patients (N = 626).

| Predictor                             |               | Adjusted OR<br>(95% CI) |
|---------------------------------------|---------------|-------------------------|
| <b>Sibling position</b>               | First-born    | 1                       |
|                                       | Middle-born   | 1.21 (0.63-2.32)        |
|                                       | Final-born    | 0.90 (0.47-1.73)        |
| <b>Age</b>                            | >40 years old | 1                       |
|                                       | ≤40 years old | 1.17 (0.57-2.43)        |
| <b>Marital Status</b>                 | Married       | 1                       |
|                                       | Unmarried     | 2.62 (1.38-4.96)        |
| <b>Education</b>                      | ≤ High school | 1                       |
|                                       | > High school | 1.77 (1.01-3.12)        |
| <b>Site</b>                           | Site A        | 1                       |
|                                       | Site B        | 0.46 (0.21-1.00)        |
|                                       | Site C        | 0.78 (0.38-1.61)        |
|                                       | Site D        | 0.22 (0.09-0.56)        |
| <b>Ever engaged in commercial sex</b> | No            | 1                       |
|                                       | Yes           | 0.97 (0.40-2.37)        |
